# Supplementary material for: Photocatalytic formation of a gas permeable layer selectively deposited on supported metal nanoparticles for sintering-resistant thermal catalysis
Source: Royal Society of Chemistry journal article supplement (doi:10.1039/d2na00703g), 2022-12-19
Supplement: d2na00703g1.pdf [file d2na00703g1.pdf]

## Supplementary information

### Photocatalytic formation of gas permeable layer selectively deposited on supported metal nanoparticles for sintering resistant thermal catalysis

*Ayato Takabayashi,<sup>a</sup> Fuminao Kishimoto,<sup>a</sup> Hiroto Tsuchiya,<sup>b</sup> Hitoshi Mikami,<sup>b</sup> Kazuhiro Takanabe,<sup>a\*</sup>*

<sup>a</sup> Department of Chemical System Engineering, School of Engineering, The University of Tokyo, 7-3-1 Hongo, Bunkyo-ku, Tokyo, 113-8656, Japan

<sup>b</sup> Honda R&D Co., Ltd., 4630 Shimotakanezawa, Haga-machi, Hagagun, Tochigi 321-3393, Japan

KEYWORDS: Core-shell catalyst, Automobile catalyst, Photodeposition, Sintering, Thermal stability

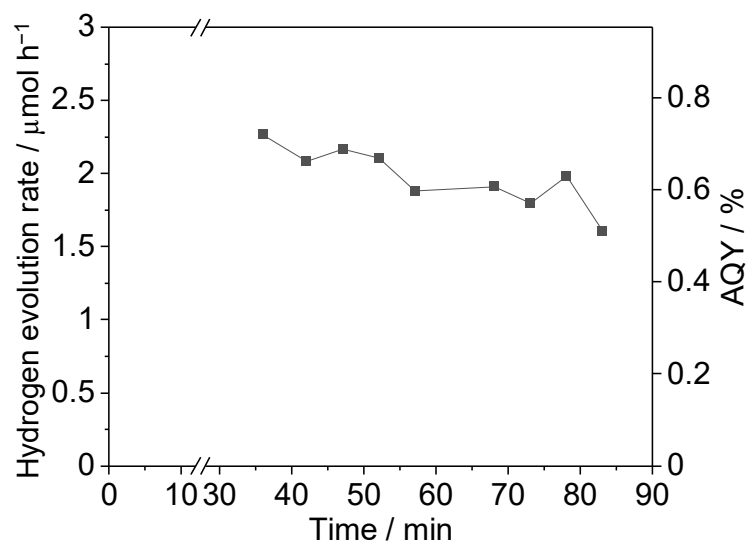

**Figure S1.** Photocatalytic hydrogen evolution rate on Pd/TiO<sub>2</sub>. Pd/TiO<sub>2</sub> (0.010 g) was dispersed in aqueous solution of 10 vol.% MeOH (10 mL), and the slurry was irradiated with UV light (365 nm, 870 mW) under ambient pressure with stirring.

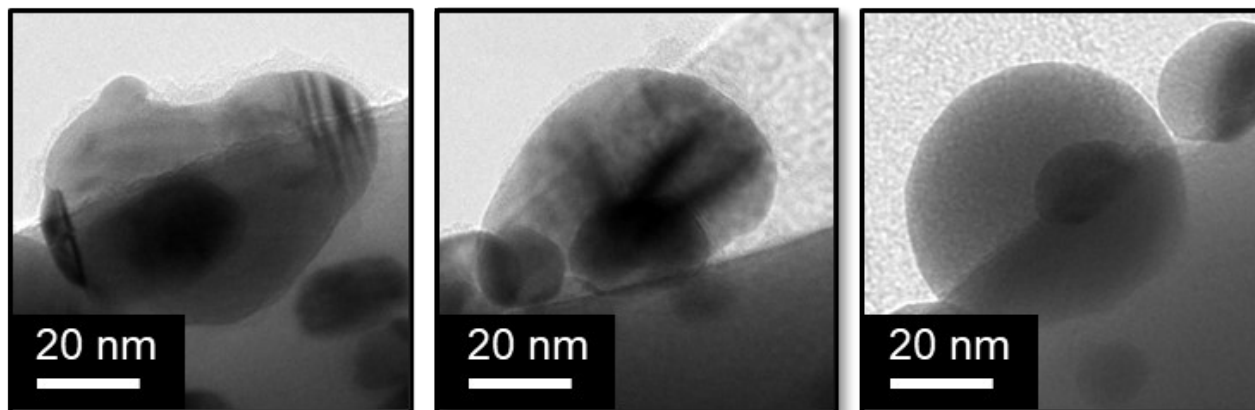

**Figure S2.** TEM images of 5 wt% Pd@SiO<sub>2</sub>/TiO<sub>2</sub>-500.

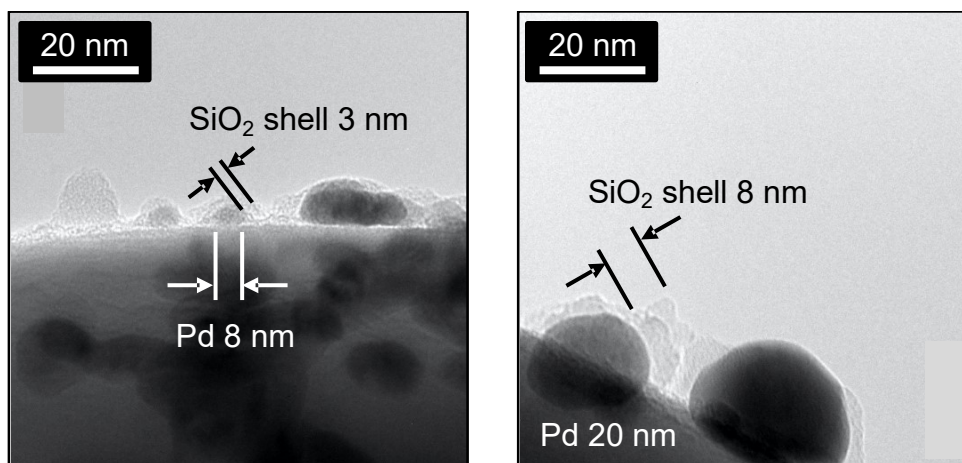

**Figure S3.** TEM images of 1 wt.% Pd@SiO<sub>2</sub>/TiO<sub>2</sub>-500. Pd nanoparticles with size of about 5 nm were covered by amorphous SiO<sub>2</sub> shells with a thickness of a few nanometers.

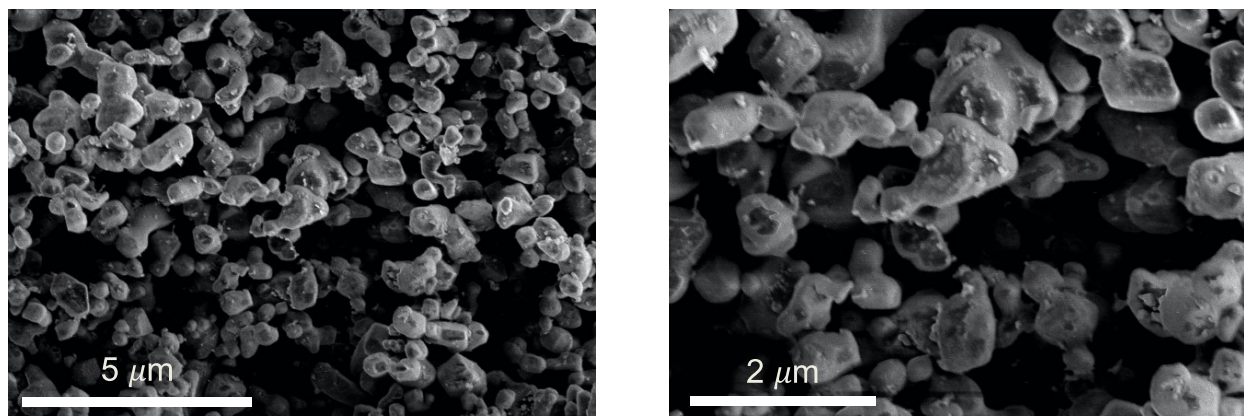

**Figure S4.** SEM images of 5 wt.% Pd@SiO<sub>2</sub>/TiO<sub>2</sub>-500.

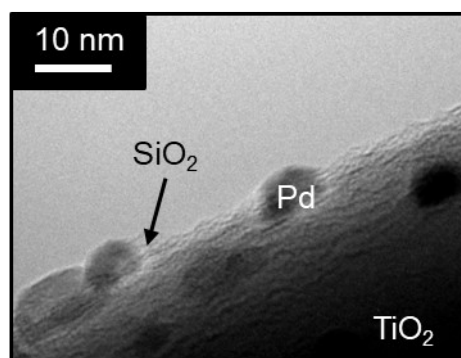

**Figure S5.** TEM image of the Pd/TiO<sub>2</sub> after TEOS treatment under dark condition.
